# Supplementary figures and images for: Characterization of a Novel Heterochromatin Protein 1 Homolog “HP1c” in the Silkworm, Bombyx mori
Source: MDPI journal article supplement (doi:10.3390/insects13070631), 2022-07-14

Figure 3

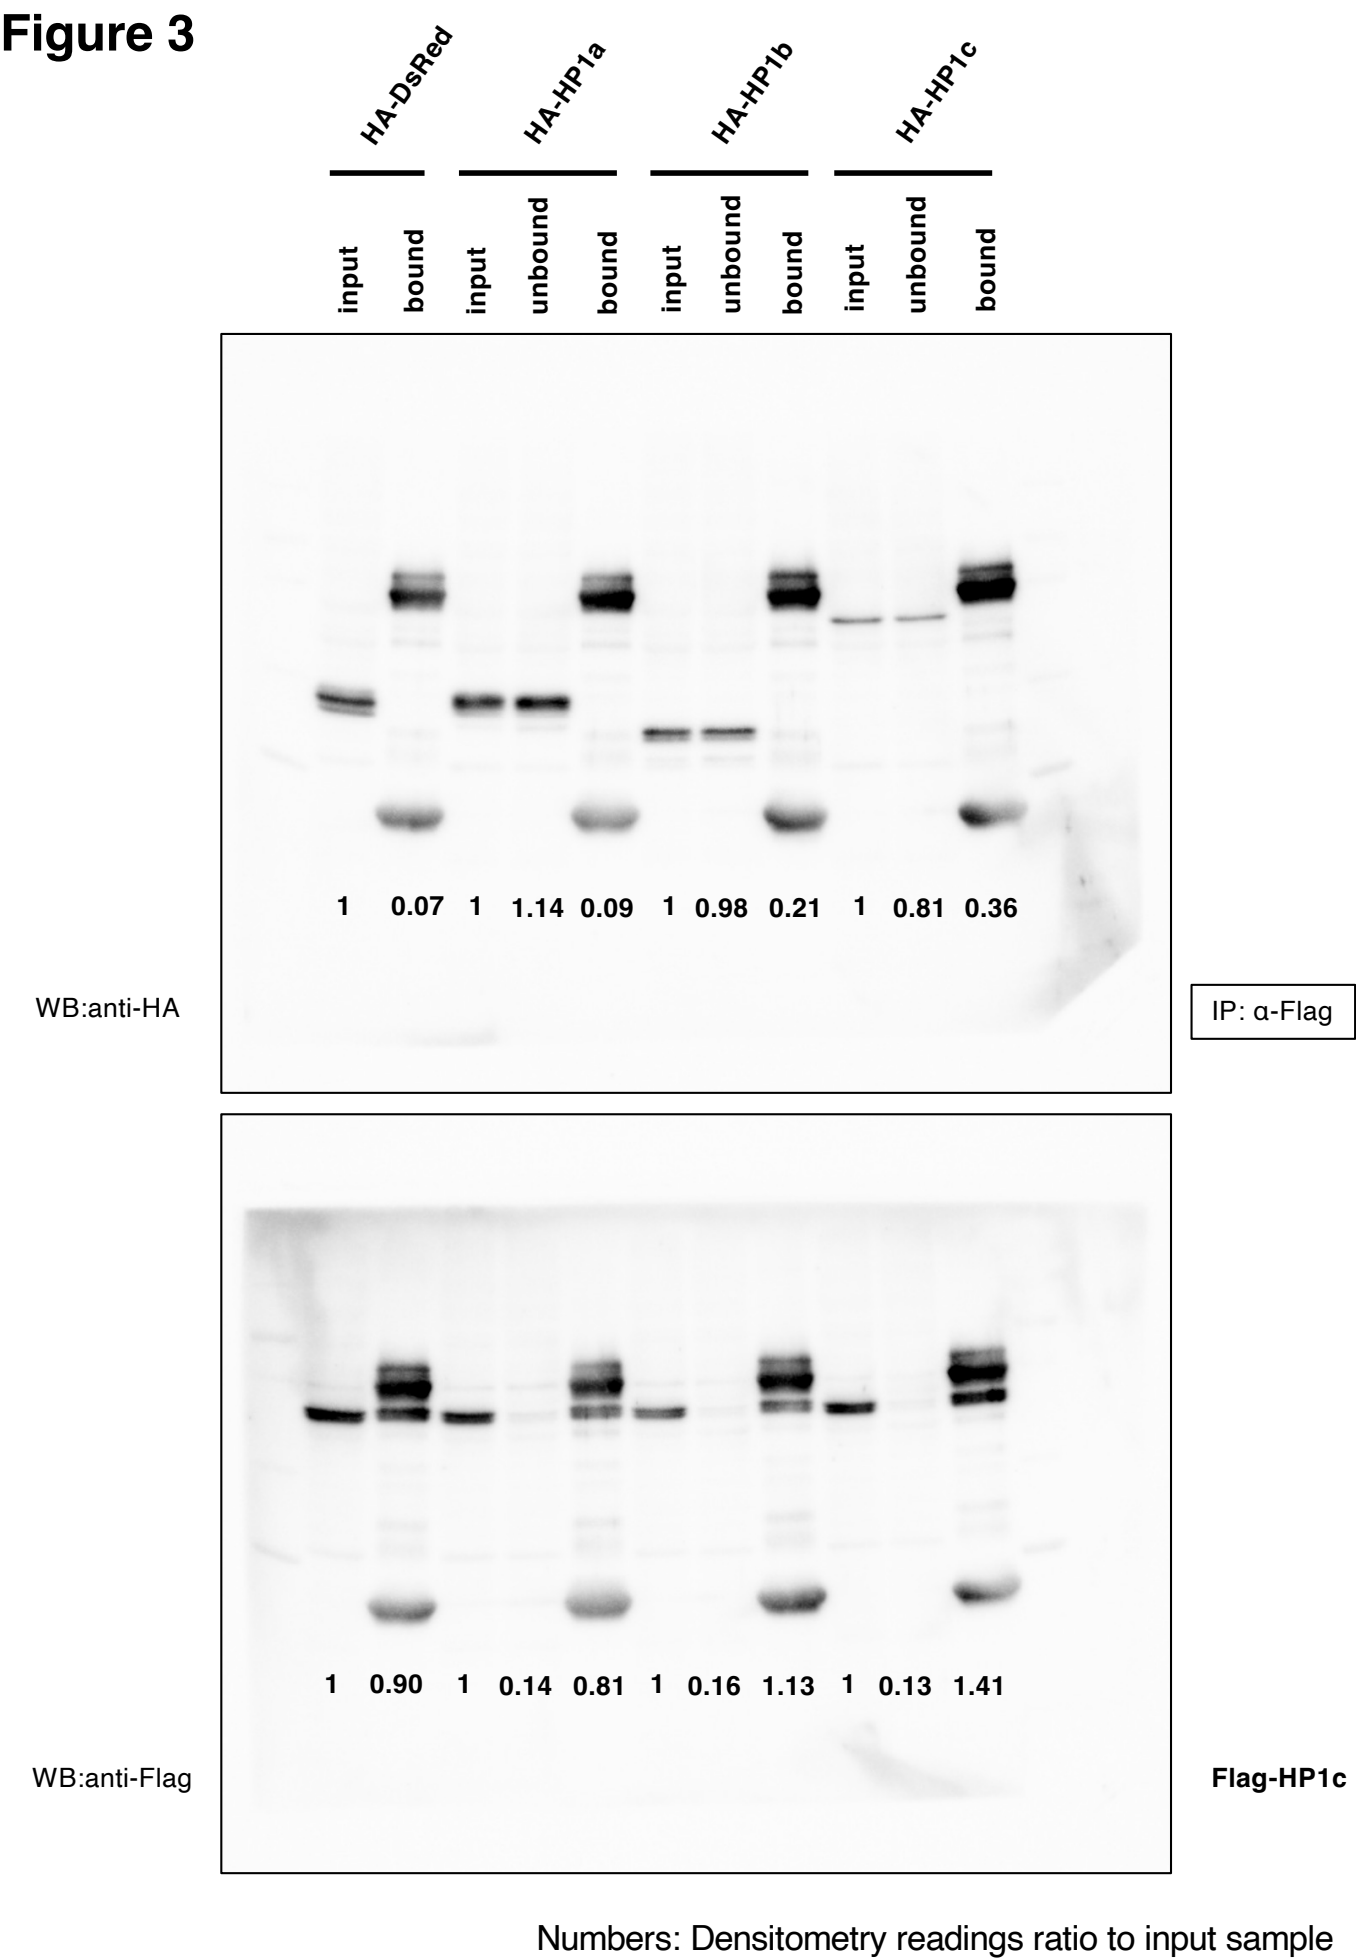

Figure S1

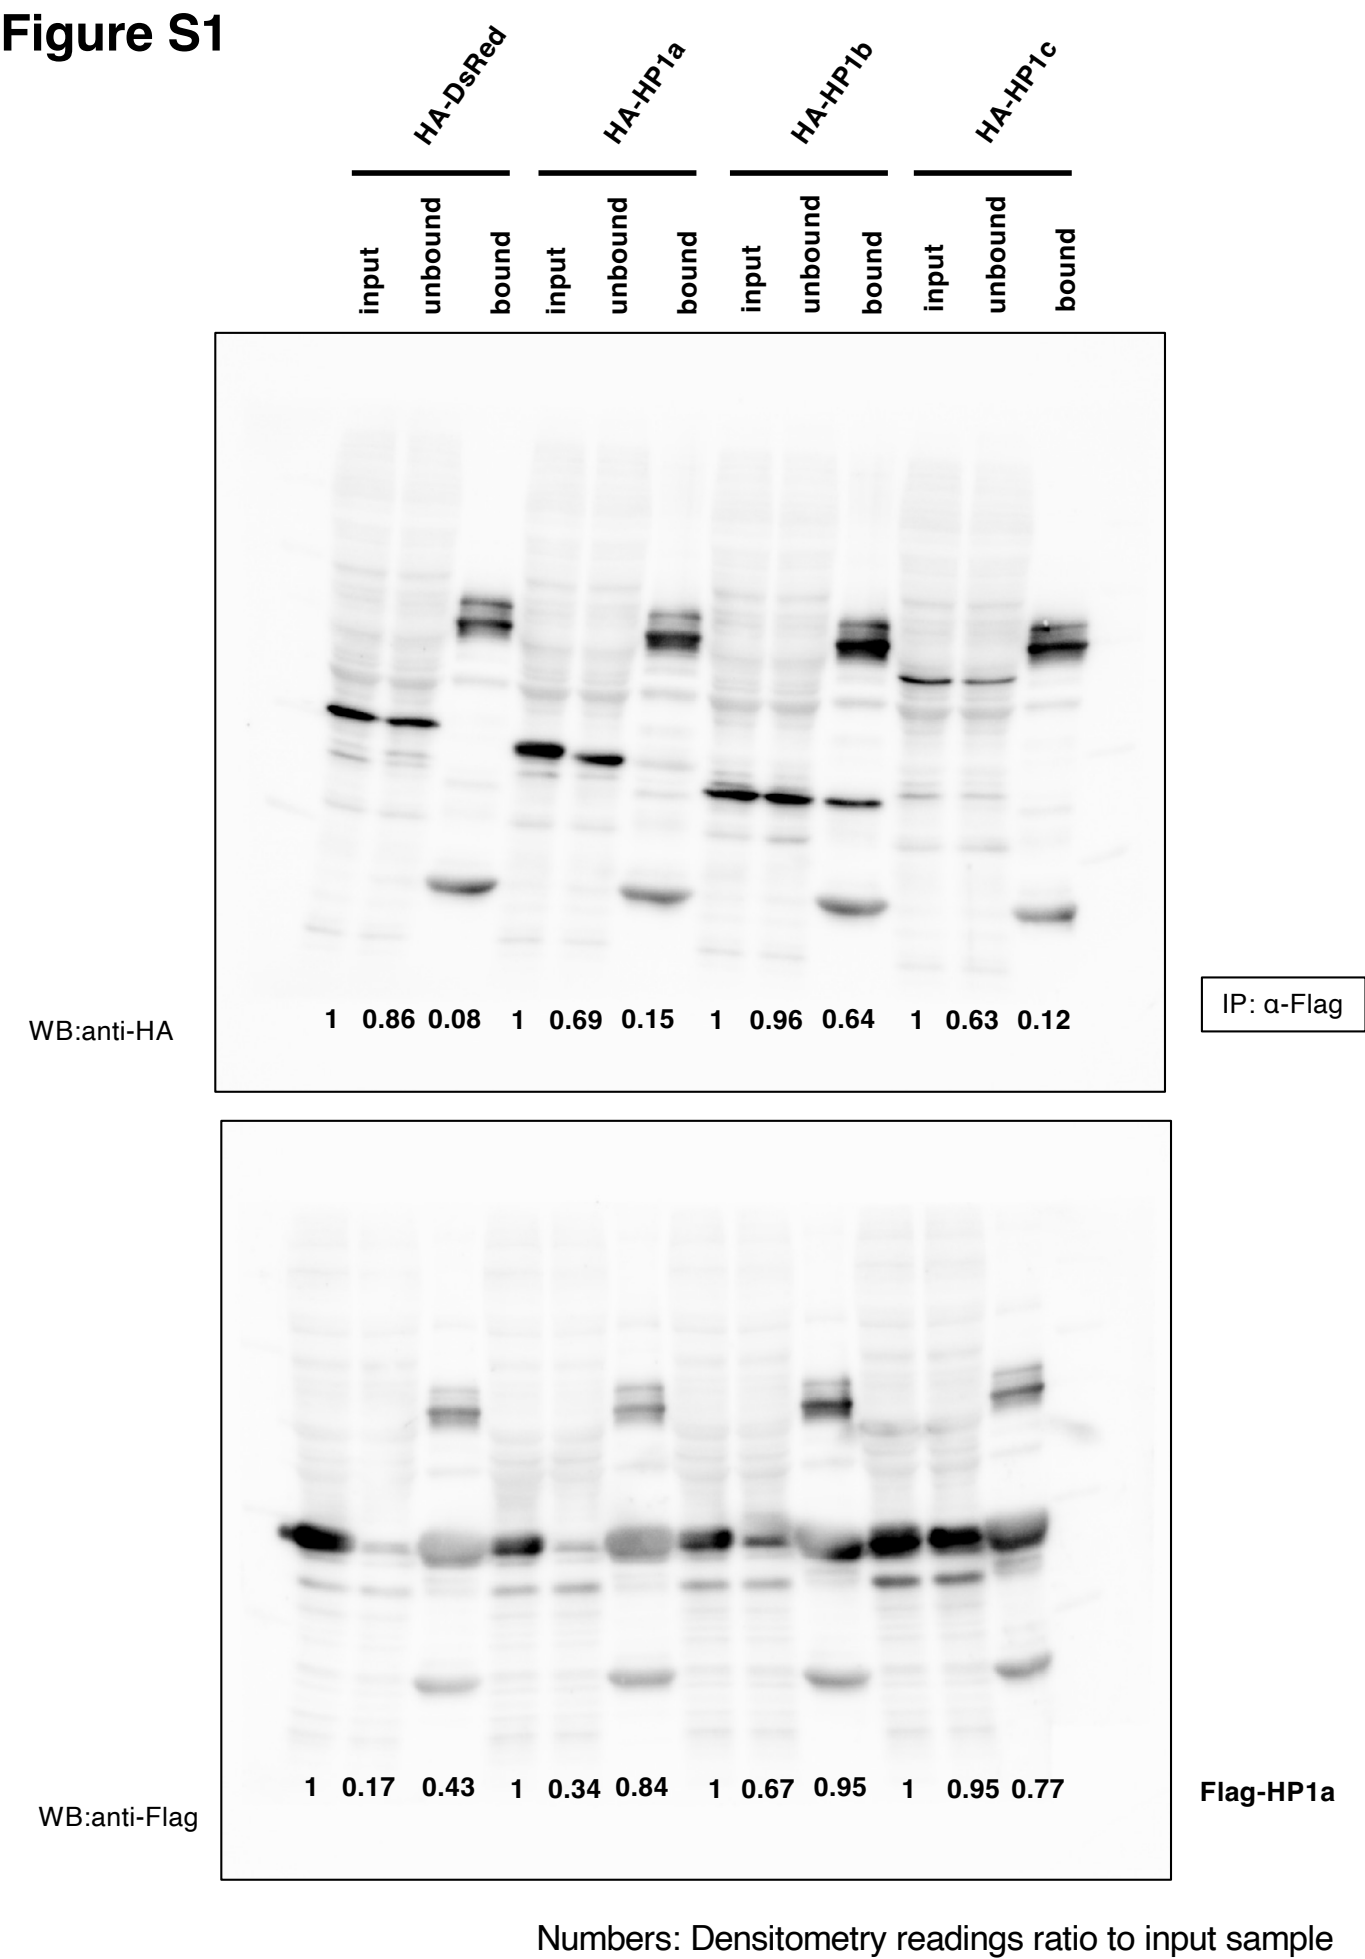

Supplement: s1 [file s1]

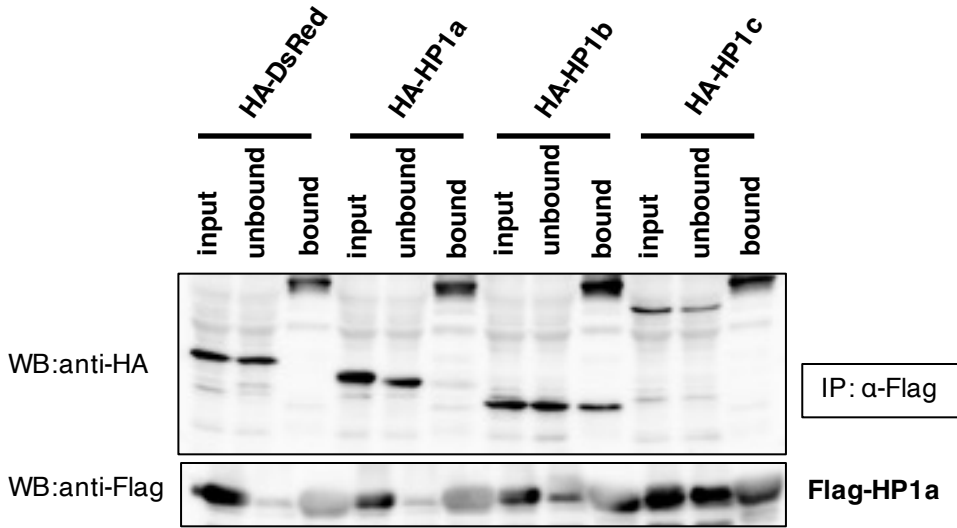

Supplement: s1 [file s1]
